# Supplementary material for: Constructing nickel sulfide heterojunctions by W-doping-induced structural transition for enhanced oxygen evolution
Source: Royal Society of Chemistry journal article supplement (doi:10.1039/d2ta00149g), 2022-01-01
Supplement: d2ta00149g1.pdf [file d2ta00149g1.pdf]

# Constructing Nickel Sulfide Heterojunction by W-doping-induced Structural Transition for Enhanced Oxygen Evolution

Ziqian Xue,<sup>+</sup> Yawen Liu, <sup>+</sup> Qinglin Liu, Yawei Zhang, Meng Yu, Qianwei Liang, Jianqiang Hu\* and Guangqin Li\*

Dr. Z. Xue, Q. Liu, Y. Zhang, Prof. G. Li  
MOE Laboratory of Bioinorganic and Synthetic Chemistry  
Lehn Institute of Functional Materials  
School of Chemistry  
Sun Yat-Sen University  
Guangzhou, 510275, P. R. China  
E-mail: liguangqin@mail.sysu.edu.cn

Y. Liu, Dr. Y. Meng, Dr. Q. Liang, Prof. J. Hu  
College of Chemistry and Chemical Engineering  
South China University of Technology  
Guangzhou, 510640, P. R. China  
E-mail: jqhusc@scut.edu.cn

## 1. Experimental Section

### 1.1 Chemicals

Thioacetamide (TAA,  $\text{CH}_3\text{CSNH}_2$ , AR, 99%), sodium tungstate dihydrate ( $\text{Na}_2\text{WO}_4 \cdot 2\text{H}_2\text{O}$ , ACS, 99.0-101.0%), Nickel(II) acetylacetonate ( $\text{C}_{10}\text{H}_{14}\text{NiO}_4 \cdot 2\text{H}_2\text{O}$ , AR, 99%), Thiourea ( $\text{CH}_4\text{N}_2\text{S}$ , AR, 99%), PVP (Polyvinylpyrrolidone, K30), Monoethanolamine ( $\text{C}_2\text{H}_7\text{NO}$ , AR), Diethanolamine ( $\text{C}_4\text{H}_{11}\text{NO}_2$ , AR), KOH and commercial  $\text{RuO}_2$  were purchased from Aladdin (Shanghai, China).

### 1.2 Synthesis of W-Ni<sub>3</sub>S<sub>2</sub>/Ni<sub>7</sub>S<sub>6</sub>.

The W-Ni<sub>3</sub>S<sub>2</sub>/Ni<sub>7</sub>S<sub>6</sub> nanorod array was synthesized by a simple hydrothermal method. Firstly, 250 mg thioacetamide (TAA,  $\text{CH}_3\text{CSNH}_2$ ), 1.5 mmol sodium tungstate dihydrate ( $\text{Na}_2\text{WO}_4 \cdot 2\text{H}_2\text{O}$ ) and 40 mg PVP were dissolved in 60 mL deionized water, continuous stirring for 20 min. Meanwhile, a piece of Ni foam (2×3 cm<sup>2</sup>) was cleaned by ultrasonic treatment with 3 M HCl solution, ethanol, and deionized water for 20 min each. Secondly, Ni foam was immersed into the prepared

solution and heating the solution at 160°C for 12 h in a sealed autoclave. Finally, the hydrothermal product was washed with deionized water and dried in air to obtain the W-Ni<sub>3</sub>S<sub>2</sub>/Ni<sub>7</sub>S<sub>6</sub> nanorod arrays catalyst. The loading weights of W-Ni<sub>3</sub>S<sub>2</sub>/Ni<sub>7</sub>S<sub>6</sub> on Ni foam were approximately 2.5 mg·cm<sup>-1</sup>.

### 1.3 Synthesis of W-Ni<sub>3</sub>S<sub>2</sub>.

For preparing the W-Ni<sub>3</sub>S<sub>2</sub> nanorod arrays, 250 mg thioacetamide (TAA, CH<sub>3</sub>CSNH<sub>2</sub>), 35 mg sodium tungstate dihydrate (Na<sub>2</sub>WO<sub>4</sub>·2H<sub>2</sub>O) and 40 mg PVP were dissolved in 60 mL deionized water, continuous stirring for 20 min. Meanwhile, a piece of Ni foam (2×3 cm<sup>2</sup>) was cleaned by ultrasonic treatment with 3 M HCl solution, ethanol, and deionized water for 20 minutes each. Then, Ni foam was immersed into the prepared solution and heating the solution at 160°C for 12 h in a sealed autoclave. Finally, the hydrothermal product was washed with deionized water and dried in air to obtain the W-Ni<sub>3</sub>S<sub>2</sub> nanorod arrays. The loading weights of The W-Ni<sub>3</sub>S<sub>2</sub> on Ni foam were approximately 2.3 mg·cm<sup>-1</sup>.

### 1.4 Synthesis of Ni<sub>3</sub>S<sub>2</sub>

For preparing the Ni<sub>3</sub>S<sub>2</sub>, 250 mg thioacetamide (TAA, CH<sub>3</sub>CSNH<sub>2</sub>) and 40 mg PVP were dissolved in 60 mL deionized water, continuous stirring for 20 min. Meanwhile, a piece of Ni foam (2×3 cm<sup>2</sup>) was cleaned by ultrasonic treatment with 3 M HCl solution, ethanol, and deionized water for 20 minutes each. Then, Ni foam was immersed into the prepared solution and heating the solution at 160°C for 12 h in a sealed autoclave. Finally, the hydrothermal product was washed with deionized water and dried in air to obtain the Ni<sub>3</sub>S<sub>2</sub> catalyst supported on Ni foam. The loading weights of Ni<sub>3</sub>S<sub>2</sub> on Ni foam were approximately 2.2 mg·cm<sup>-1</sup>.

### 1.5 Synthesis of Ni<sub>7</sub>S<sub>6</sub>

For preparing the Ni<sub>7</sub>S<sub>6</sub>, 0.0617 g nickel (ii) acetylacetonate, 0.0213 g thiourea, and 100 mg PVP were dispersed in the mixture of H<sub>2</sub>O (2.0 mL), ethanolamine (6.0 mL), and diethanolamine (2.0 mL). The above mixtures were stirred for 60 minutes and heating the solution at 160°C for 12 h in a sealed autoclave. The loading amount

of Ni<sub>7</sub>S<sub>6</sub> catalyst on the Ni foam is about 2.5 mg·cm<sup>-2</sup>, which is the same loading mass with our catalyst.

### **1.6 Preparation of RuO<sub>2</sub> supported on Ni foam.**

The RuO<sub>2</sub> supported on Ni foam was prepared with the help of Nafion (5%) solution. The commercial RuO<sub>2</sub> (10 mg) was dispersed into a mixture of 980 μL ethanol and 20 μL Nafion solution. Then, the mixture was ultrasonicated for 30 min to obtain a homogeneous dispersion. Finally, the dispersed solution was loaded onto nickel foam, followed by the dry in air at room temperature. The loading amount of RuO<sub>2</sub> catalyst on the Ni foam is about 2.5 mg·cm<sup>-2</sup>, which is the same loading mass with our catalyst.

### **1.7 Material characterizations**

Characterization X-ray diffraction patterns were performed on the Rigaku SmartLab diffractometer with Cu Kα X-ray source ( $\lambda=1.540598$  Å). The field-emission scanning electron microscopy (FE-SEM) images were recorded on a Hitachi SU8010 system. Transmission electron microscopy (TEM) images were collected by a JEM-1400Plus transmission electron microscopy. Scanning transmission electron microscopy (STEM) and EDS mapping images were measured on a JEOL JEM-ARM 200F equipped with an energy dispersive X-ray spectrometer, operating at 200 kV. X-ray photoelectron spectra (XPS) tests were carried out on a VG Scientific ESCALAB 250 instrument.

### **1.8 Electrochemical measurements**

The electrochemical tests were conducted on the CHI 760E via a general three-electrode system in 1 M KOH electrolyte at room temperature. For detail, platinum plate electrode as the counter electrode and Ag/AgCl (KCl saturated) electrode as the reference electrode. Linear sweep voltammetry (LSV) curves were measured at a scan rate of 2 mV·s<sup>-1</sup>. The obtained potential in the LSV polarization curves was corrected for 95% iR losses to minimize the influence of ohmic resistance. The measured potentials versus the reversible hydrogen electrode (RHE) were converted according to the Nernst equation ( $E_{\text{RHE}}=E_{\text{Ag/AgCl}} + 0.197 + 0.059 \times \text{pH}$ )<sup>[1]</sup>. The double-layer capacitance ( $C_{\text{dl}}$ ) at different scanning rates was measured by cyclic voltammetry (CV)

within a potential range of 1.036-1.136 V vs. RHE to investigate the electrochemical active surface area (ECSA). Electrochemical impedance spectra (EIS) were measured with 5 mV amplitude in the frequency of 0.1 Hz ~100 kHz at 1.55 V vs. RHE. The turnover frequency (TOF) was calculated by the equation:  $TOF = (J \times A) / (4 \times F \times m)$ , where J is the current density ( $A\ cm^{-2}$ ) at an overpotential of 300 mV, A and m represent the area of the electrode and the number of moles of the active materials, F represents Faraday constant ( $96,485\ C\ mol^{-1}$ ).

## 2. Supplementary figures

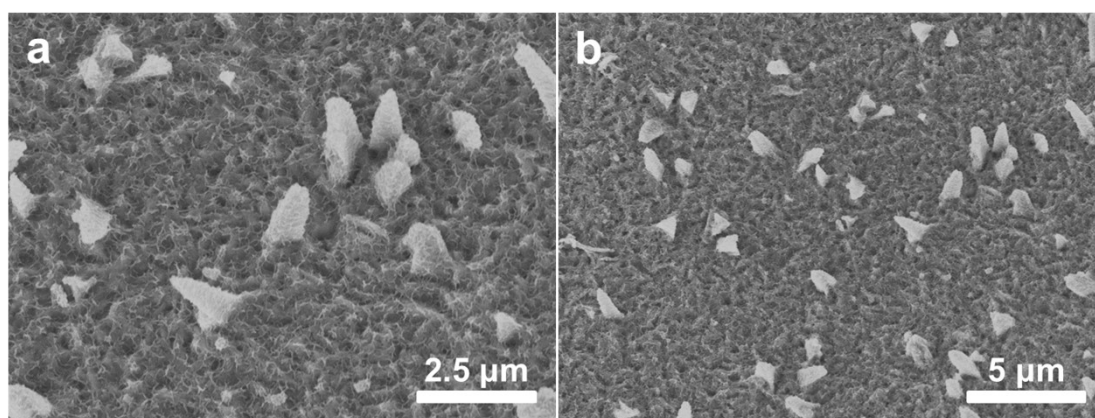

Figure S1. SEM images of  $\text{Ni}_3\text{S}_2$ .

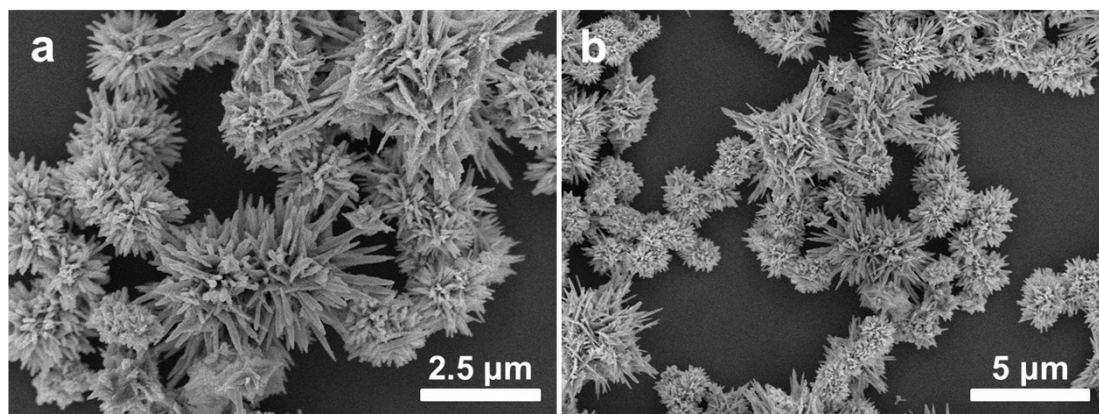

Figure S2. SEM images of  $\text{Ni}_7\text{S}_6$ .

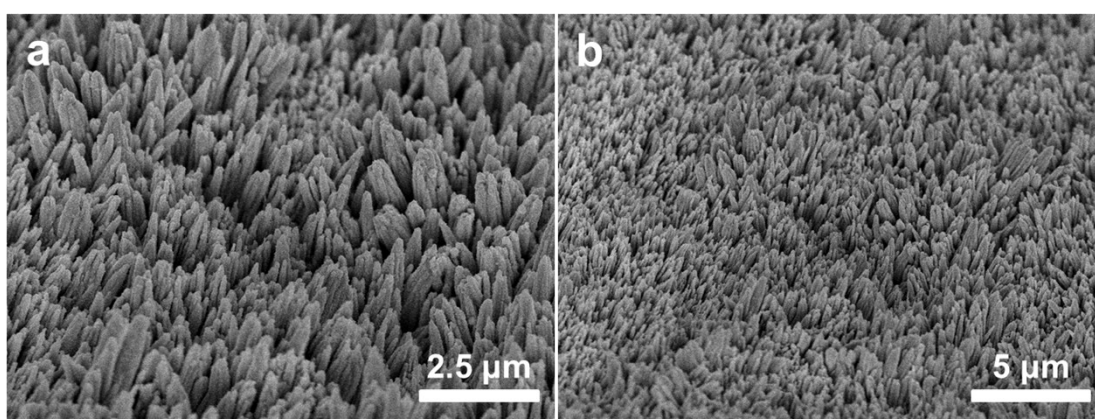

Figure S3. SEM images of  $\text{W-Ni}_3\text{S}_2$ .

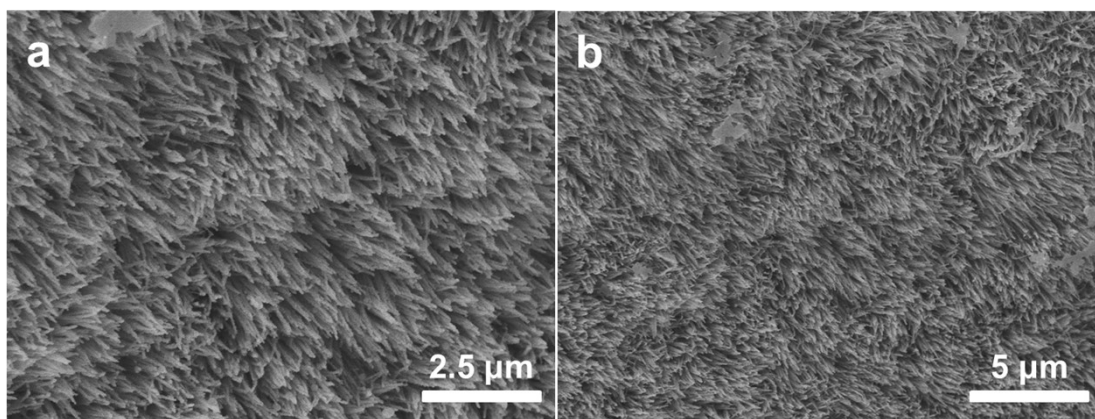

Figure S4. SEM images of W-Ni<sub>3</sub>S<sub>2</sub>/Ni<sub>7</sub>S<sub>6</sub>.

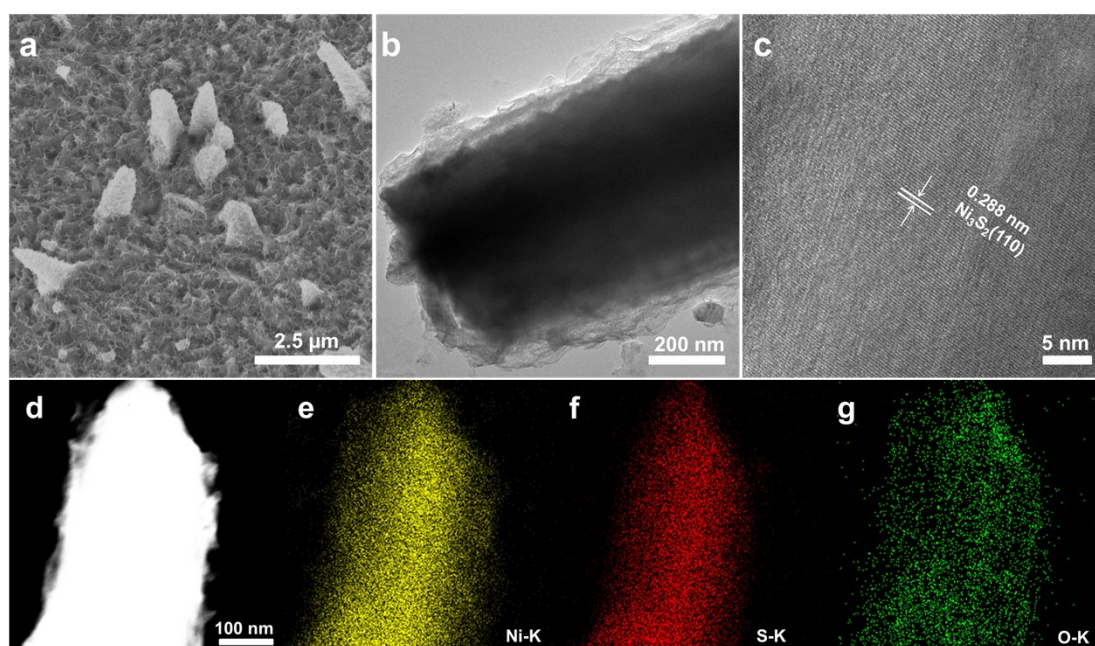

Figure S5. a) FESEM, b) TEM, c) HRTEM images of the Ni<sub>3</sub>S<sub>2</sub>. d–g) HAADF-STEM image and STEM-EDS mappings of Ni<sub>3</sub>S<sub>2</sub>.

Table S1. The molar ratio of Ni/W in different catalysts

| catalyst                                                          | Mass%  |       | Atom% |      |
|-------------------------------------------------------------------|--------|-------|-------|------|
|                                                                   | Ni     | W     | Ni    | W    |
| Ni <sub>3</sub> S <sub>2</sub>                                    | 100.00 | 0     | 100   | 0    |
| W- Ni <sub>3</sub> S <sub>2</sub>                                 | 99.32  | 0.68  | 99.78 | 0.22 |
| W- Ni <sub>3</sub> S <sub>2</sub> /Ni <sub>7</sub> S <sub>6</sub> | 87.62  | 12.38 | 95.68 | 4.32 |

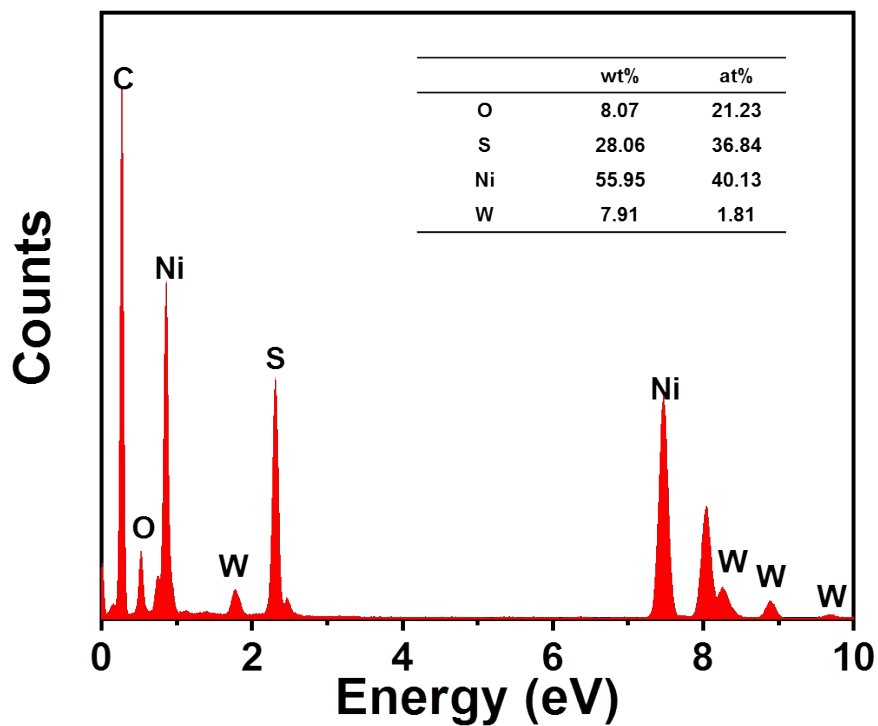

Figure S6. Energy dispersive X-ray (EDX) spectrum of W-Ni<sub>3</sub>S<sub>2</sub>/Ni<sub>7</sub>S<sub>6</sub>.

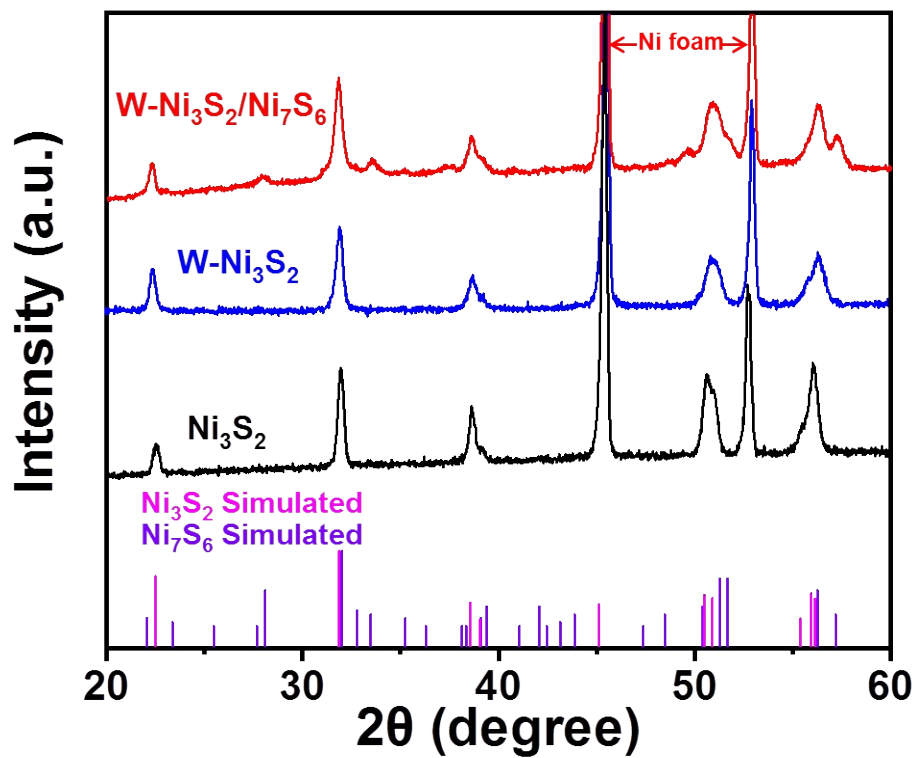

Figure S7. XRD of  $\text{Ni}_3\text{S}_2$ ,  $\text{W-Ni}_3\text{S}_2$  and  $\text{W-Ni}_3\text{S}_2/\text{Ni}_7\text{S}_6$ .

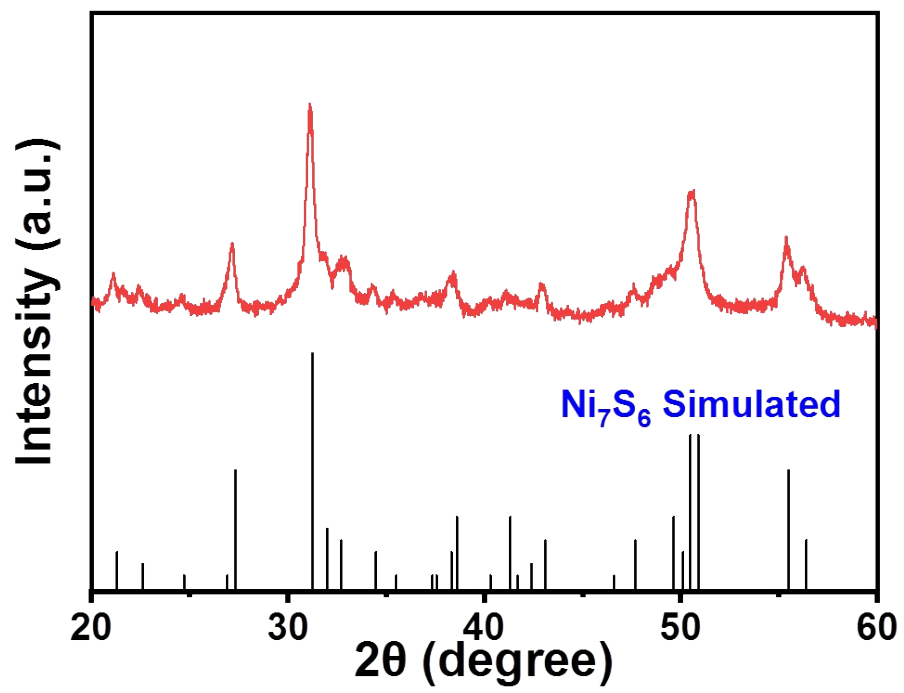

Figure S8. XRD of  $\text{Ni}_7\text{S}_6$ .



Table S2. Comparisons of OER activity of art non-noble-metal electrocatalysts.

| catalyst                                                                     | Electrolyte | Overpotential<br>(mV)                 | Tafel slope<br>(mV dec <sup>-1</sup> ) | Substrates | Reference |
|------------------------------------------------------------------------------|-------------|---------------------------------------|----------------------------------------|------------|-----------|
| W-Ni <sub>3</sub> S <sub>2</sub> /Ni <sub>7</sub> S <sub>6</sub>             | 1.0 M KOH   | $\eta_{100}=202$<br>$\eta_{200}=285$  | 27.9                                   | Ni foam    | This work |
| Ni <sub>3</sub> S <sub>2</sub>                                               | 1.0 M KOH   | $\eta_{10}=324$                       | 72.1                                   | Ni foam    | [2]       |
| Fe <sub>0.9</sub> Ni <sub>2.1</sub> S <sub>2</sub> @NF                       | 1.0 M KOH   | $\eta_{100}=252$                      | 64                                     | Ni foam    | [3]       |
| CoMoNiS-NF-31                                                                | 1.0 M KOH   | $\eta_{100}=260$                      | 85                                     | Ni foam    | [4]       |
| Mo-Ni <sub>3</sub> S <sub>2</sub> /Ni <sub>x</sub> S <sub>y</sub> /NF        | 1.0 M KOH   | $\eta_{50}=238$                       | 60.6                                   | Ni foam    | [5]       |
| 3D Se-(NiCo)S <sub>x</sub> (OH) <sub>x</sub>                                 | 1.0 M KOH   | $\eta_{10}=155$                       | 33.9                                   | Ni foam    | [6]       |
| Ni <sub>3</sub> S <sub>2</sub> NTFs                                          | 1.0 M NaOH  | $\eta_{100}=330$                      | 101.2                                  | Ni foil    | [7]       |
| CoMoS <sub>4</sub> /Ni <sub>3</sub> S <sub>2</sub>                           | 1.0 M KOH   | $\eta_{10}=200$<br>$\eta_{10}=218$    | 63                                     | -          | [8]       |
| FeMOFs-SO <sub>3</sub>                                                       | 1.0 M KOH   | $\eta_{500}=298$<br>$\eta_{1000}=330$ | 36.2                                   | -          | [9]       |
| (Co <sub>0.85</sub> Fe <sub>0.15</sub> ) <sub>9</sub> S <sub>8</sub>         | 1.0 M KOH   | $\eta_{10}=255$                       | 49                                     | -          | [10]      |
| Ni <sub>3</sub> S <sub>2</sub> @Co(OH) <sub>2</sub>                          | 1.0 M KOH   | $\eta_{10}=290$                       | 90.7                                   | Ni foam    | [11]      |
| Ni <sub>3</sub> S <sub>2</sub> @graphite foam                                | 1.0 M KOH   | $\eta_{10}=240$                       | 62.4                                   | Ni foam    | [12]      |
| Co <sub>9</sub> S <sub>8</sub> -Ni <sub>3</sub> S <sub>2</sub><br>nanoarrays | 1.0 M KOH   | $\eta_{100}=346$<br>$\eta_{20}=294$   | 79.3                                   | Ni foam    | [13]      |
| Ni <sub>3</sub> S <sub>2</sub> -Co <sub>9</sub> S <sub>8</sub><br>nanowires  | 1.0 M KOH   | $\eta_{50}=320$<br>$\eta_{100}=350$   | 80                                     | Ni foam    | [14]      |
| Co <sub>9</sub> S <sub>8</sub> -Ni <sub>3</sub> S <sub>2</sub> nanotubes     | 1.0 M KOH   | $\eta_{50}=281$                       | 53.3                                   | Ni foam    | [15]      |
| Ni <sub>3</sub> S <sub>2</sub> /Co <sub>9</sub> S <sub>8</sub>               | 1.0 M KOH   | $\eta_{100}=340$                      | 66                                     | Ni foam    | [16]      |
| SnS-Ni <sub>3</sub> S <sub>2</sub> /NF                                       | 1.0 M KOH   | $\eta_{100}=387$                      | 126                                    | Ni foam    | [17]      |
| NiCo-LDH/NiCo <sub>2</sub> S <sub>4</sub><br>/CC                             | 1.0 M KOH   | $\eta_{100}=254$                      | 48                                     | CC         | [18]      |

|                                                                       |           |                                     |        |         |      |
|-----------------------------------------------------------------------|-----------|-------------------------------------|--------|---------|------|
| Ni <sub>3</sub> S <sub>2</sub> /FeS                                   | 1.0 M KOH | $\eta_{30}=295$                     | 79.8   | -       | [19] |
| Co <sub>9</sub> S <sub>8</sub> /Cu <sub>2</sub> S/CF                  | 1.0 M KOH | $\eta_{10}=195$<br>$\eta_{50}=255$  | 78.8   | Cu foam | [20] |
| Fe,Mn-Ni <sub>3</sub> S <sub>2</sub> /NF                              | 1.0 M KOH | $\eta_{30}=216$                     | 63.29  | Ni foam | [21] |
| Ni <sub>3</sub> S <sub>2</sub> @MIL-53<br>(NiFeCo)                    | 1.0 M KOH | $\eta_{50}=236$                     | 14.8   | Ni foam | [22] |
| Ni <sub>3</sub> S <sub>2</sub> -CeO <sub>2</sub>                      | 1.0 M KOH | $\eta_{20}=264$                     | 146    | Ni foam | [23] |
| NiO- Ni <sub>3</sub> S <sub>2</sub>                                   | 1.0 M KOH | $\eta_{20}=290$                     | 75     | Ni foam | [24] |
| Ni <sub>3</sub> S <sub>2</sub> /NiS hollow core                       | 1.0 M KOH | $\eta_{10}=298$                     | 58.6   | -       | [25] |
| MoS <sub>2</sub> /NiS                                                 | 1.0 M KOH | $\eta_{10}=350$                     | 108    | -       | [26] |
| NiS/Bi <sub>2</sub> WO <sub>6</sub>                                   | 1.0 M KOH | $\eta_{10}=527$                     | 238    | -       | [27] |
| Ni <sub>3</sub> S <sub>2</sub> /Ni@CC                                 | 1.0 M KOH | $\eta_{10}=290.9$                   | 101.26 | CC      | [28] |
| FeNi <sub>3</sub> N- Ni <sub>3</sub> S <sub>2</sub>                   | 1.0 M KOH | $\eta_{10}=230$                     | 38     | -       | [29] |
| N- Ni <sub>3</sub> S <sub>2</sub> /VS <sub>2</sub>                    | 1.0 M KOH | $\eta_{10}=227$                     | 60     | -       | [30] |
| Ni- Ni <sub>3</sub> S <sub>2</sub> @carbon                            | 1.0 M KOH | $\eta_{10}=284$                     | 56     | -       | [31] |
| Co/Ce- Ni <sub>3</sub> S <sub>2</sub>                                 | 1.0 M KOH | $\eta_{20}=286$                     | 71.7   | Ni foam | [32] |
| Ni <sub>3</sub> S <sub>2</sub> /MIL-53(Fe)                            | 1.0 M KOH | $\eta_{10}=214$<br>$\eta_{100}=251$ | 33.8   | -       | [33] |
| CoS <sub>2</sub> / Ni <sub>3</sub> S <sub>2</sub> /CoNiO <sub>x</sub> | 1.0 M KOH | $\eta_{10}=256$<br>$\eta_{100}=300$ | 43.4   | -       | [34] |
| Fe <sub>7.2%</sub> - Ni <sub>3</sub> S <sub>2</sub> NSs               | 1.0 M KOH | $\eta_{10}=295$                     | 71     | Ni foam | [35] |
| S- Ni <sub>3</sub> S <sub>2</sub>                                     | 1.0 M KOH | $\eta_{10}=213$<br>$\eta_{100}=286$ | 45     | -       | [36] |
| NiFe-Co <sub>9</sub> S <sub>8</sub>                                   | 1.0 M KOH | $\eta_{10}=219$                     | 55     | CC      | [37] |
| NiS/NiS <sub>2</sub>                                                  | 1.0 M KOH | $\eta_{100}=416$                    | 156.5  | -       | [38] |

Table S3. EIS results of W-Ni<sub>3</sub>S<sub>2</sub>/Ni<sub>7</sub>S<sub>6</sub>, W-Ni<sub>3</sub>S<sub>2</sub>, Ni<sub>3</sub>S<sub>2</sub>, Ni<sub>7</sub>S<sub>6</sub> and NF.

| catalyst                                                         | Solution series resistances $R_s$ | Charge transfer resistance $R_{ct}$ |
|------------------------------------------------------------------|-----------------------------------|-------------------------------------|
|                                                                  | ( $\Omega$ )                      | ( $\Omega$ )                        |
| Ni <sub>3</sub> S <sub>2</sub>                                   | 1.972                             | 5.709                               |
| Ni <sub>7</sub> S <sub>6</sub>                                   | 1.957                             | 6.282                               |
| W-Ni <sub>3</sub> S <sub>2</sub>                                 | 1.892                             | 1.498                               |
| W-Ni <sub>3</sub> S <sub>2</sub> /Ni <sub>7</sub> S <sub>6</sub> | 1.988                             | 0.7334                              |

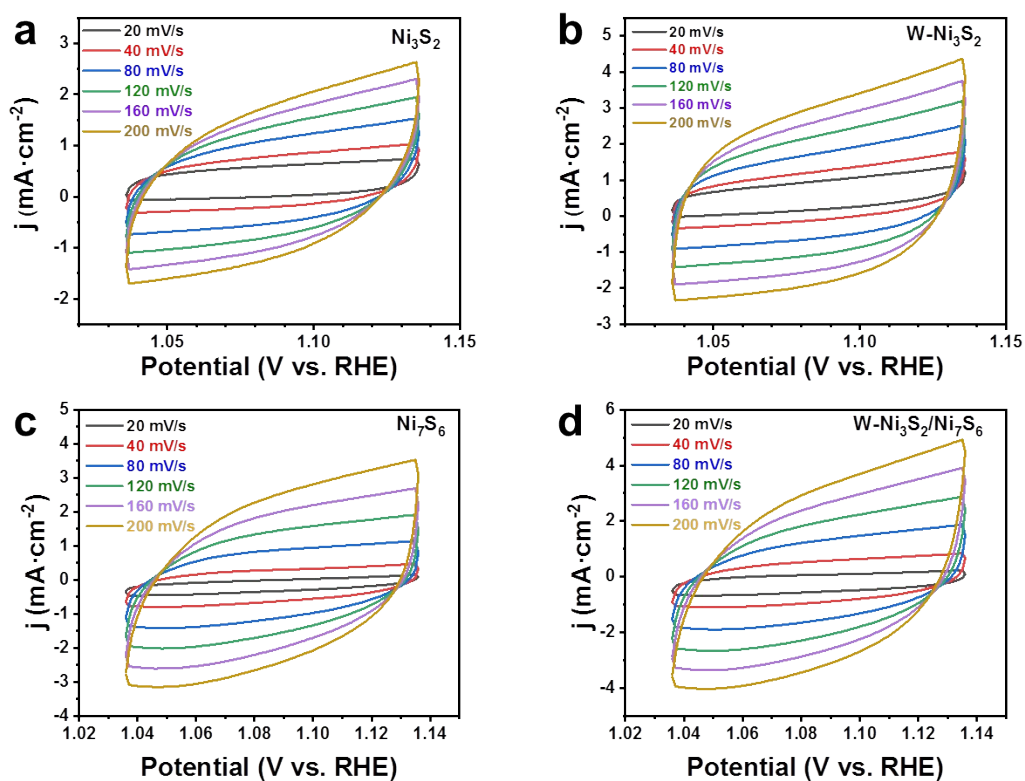

Figure S9. CV plots of a) Ni<sub>3</sub>S<sub>2</sub>, b) W-Ni<sub>3</sub>S<sub>2</sub>, c) Ni<sub>7</sub>S<sub>6</sub>, d) W-Ni<sub>3</sub>S<sub>2</sub>/Ni<sub>7</sub>S<sub>6</sub> at different scan rates.

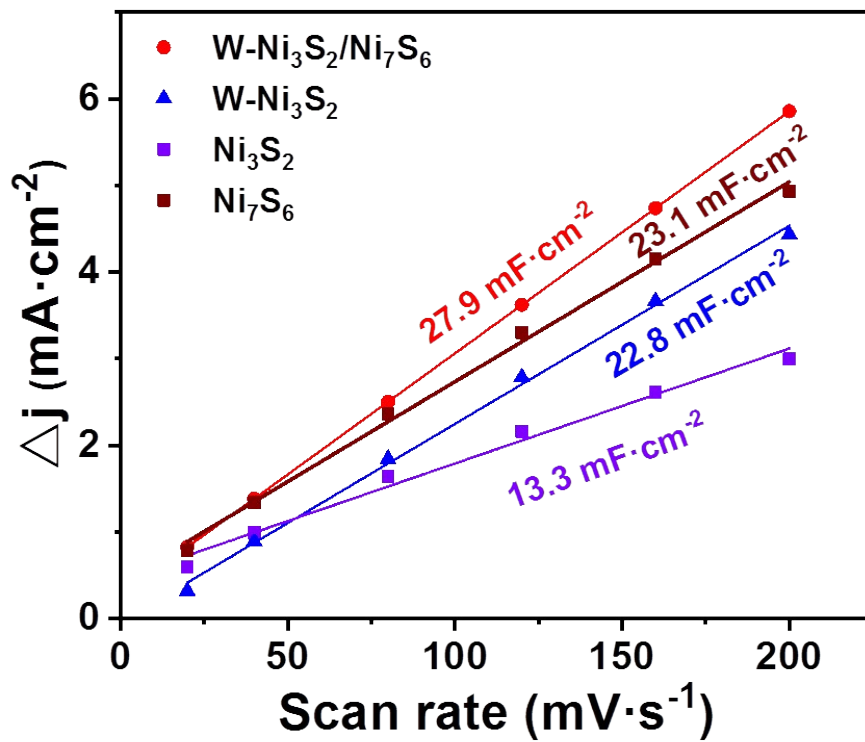

Figure S10. Capacitive currents as a function of the scan rate to give the double-layer capacitance ( $C_{dl}$ ) for different catalysts.

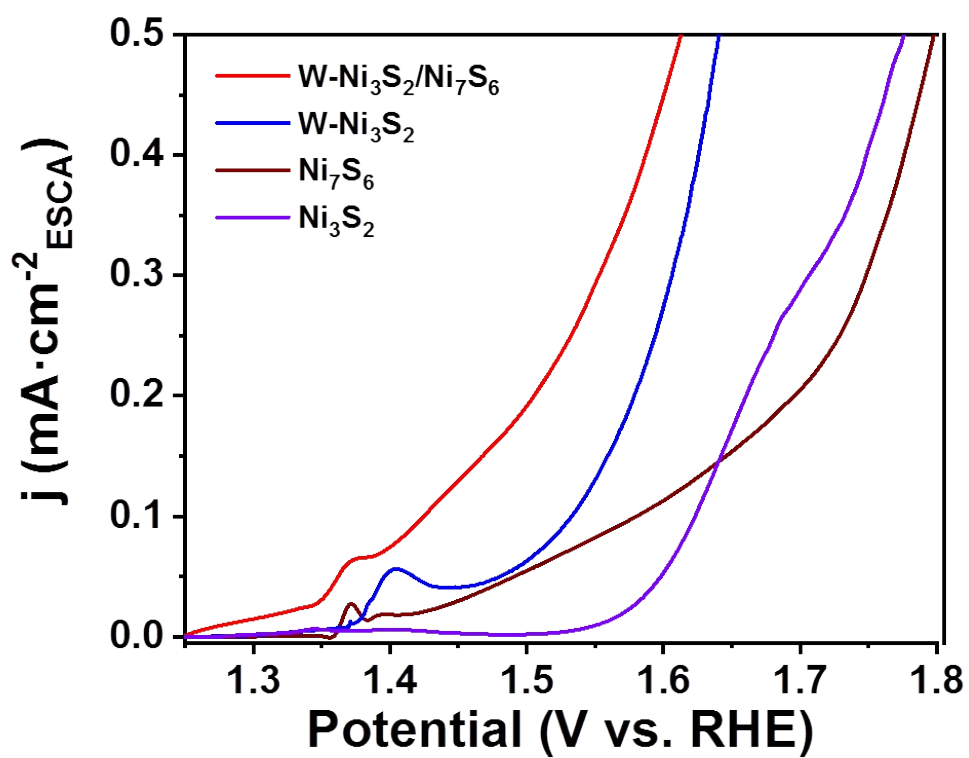

Figure S11. The OER performance of  $\text{Ni}_3\text{S}_2$ ,  $\text{W-Ni}_3\text{S}_2$  and  $\text{W-Ni}_3\text{S}_2/\text{Ni}_7\text{S}_6$  after the electrochemical surface area normalization.

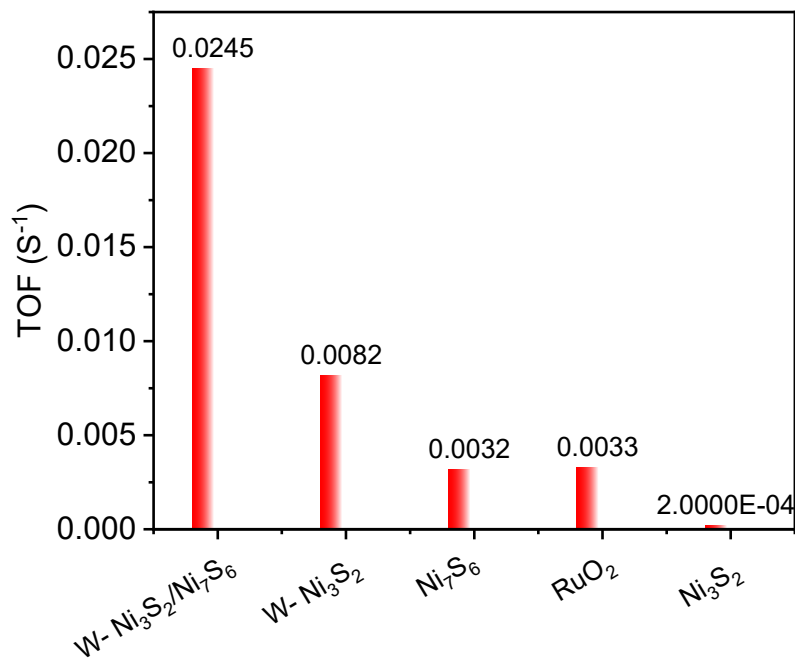

Figure S12. TOF of different electrocatalysts at an overpotential of 300 mV.

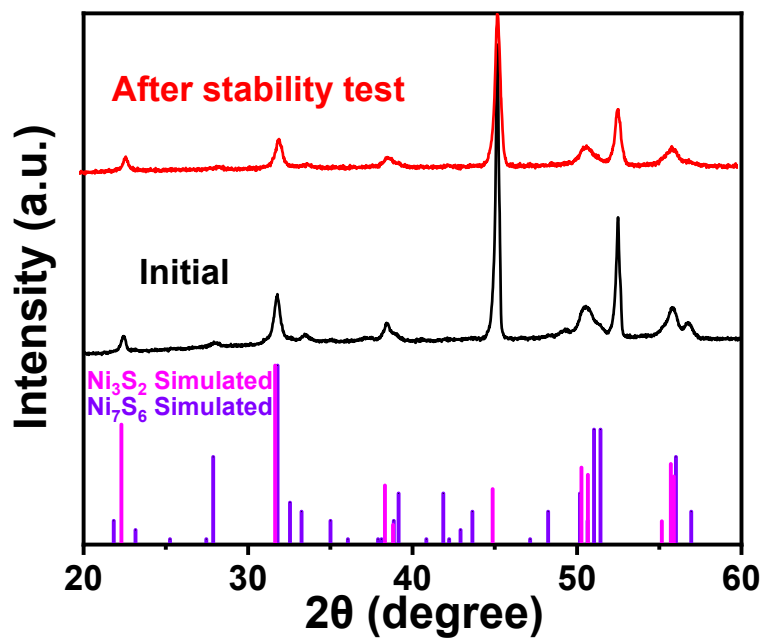

Figure S13. XRD patterns of W-Ni<sub>3</sub>S<sub>2</sub>/Ni<sub>7</sub>S<sub>6</sub> before and after stability test.

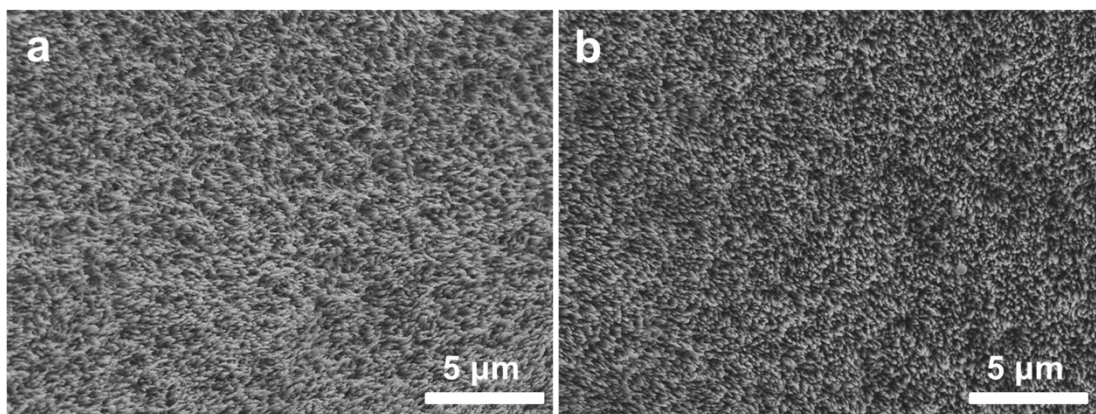

Figure S14. SEM images of W-Ni<sub>3</sub>S<sub>2</sub>/Ni<sub>7</sub>S<sub>6</sub> a) before and b) after stability test.

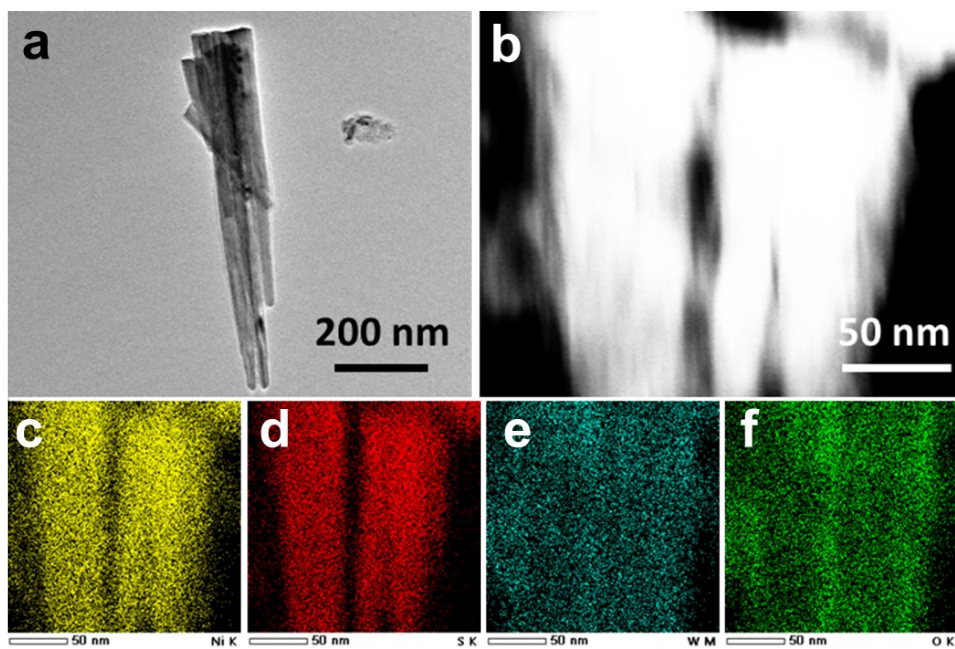

Figure S15. a) TEM images b) HRTEM images c–f) HAADF-STEM images of the W-Ni<sub>3</sub>S<sub>2</sub>/Ni<sub>7</sub>S<sub>6</sub> after stability test.

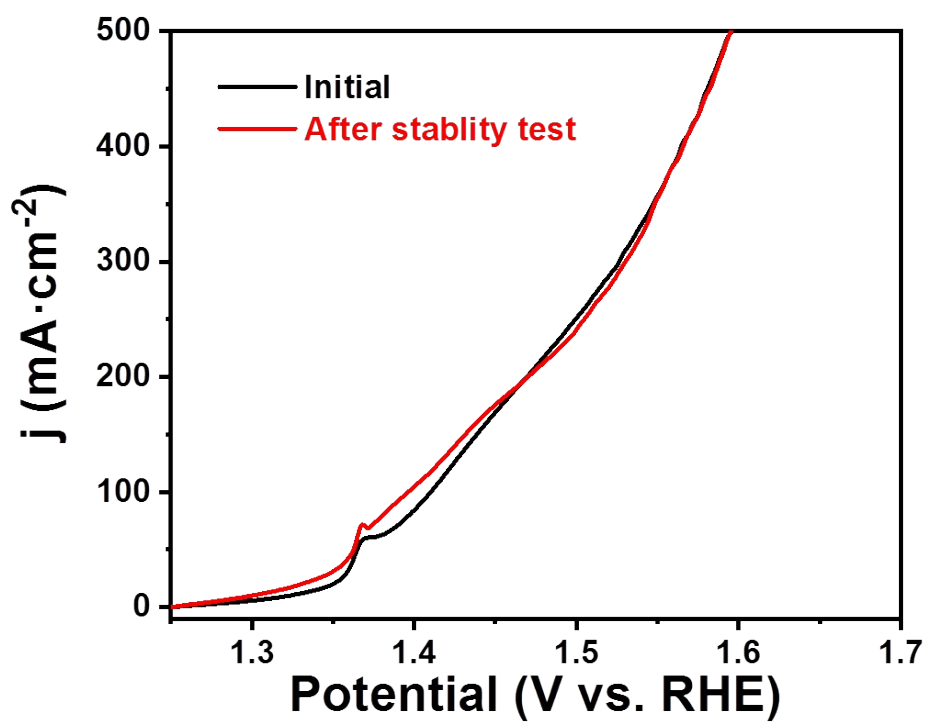

Figure S16. OER performances of W-Ni<sub>3</sub>S<sub>2</sub>/Ni<sub>7</sub>S<sub>6</sub> before and after stability test in 1.0 M KOH.



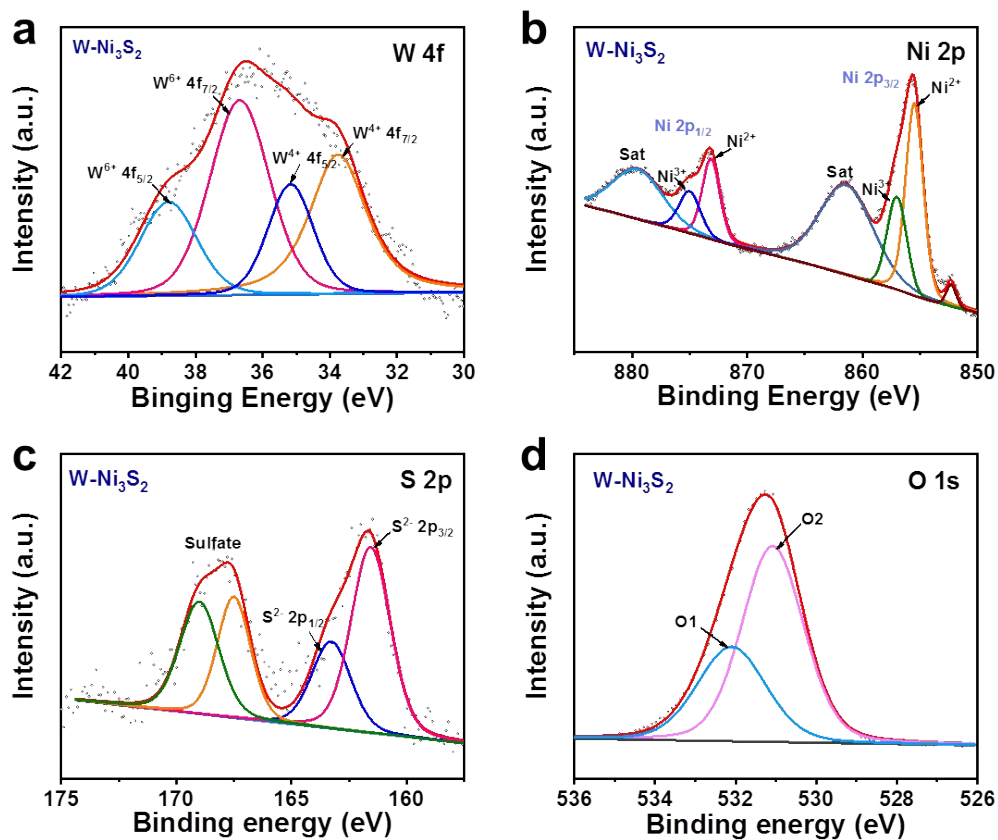

Figure S17. a) W 4f XPS spectra, b) Ni 2p XPS spectra, c) S 2p XPS spectra, d) O 1s XPS spectra of W-Ni<sub>3</sub>S<sub>2</sub>.

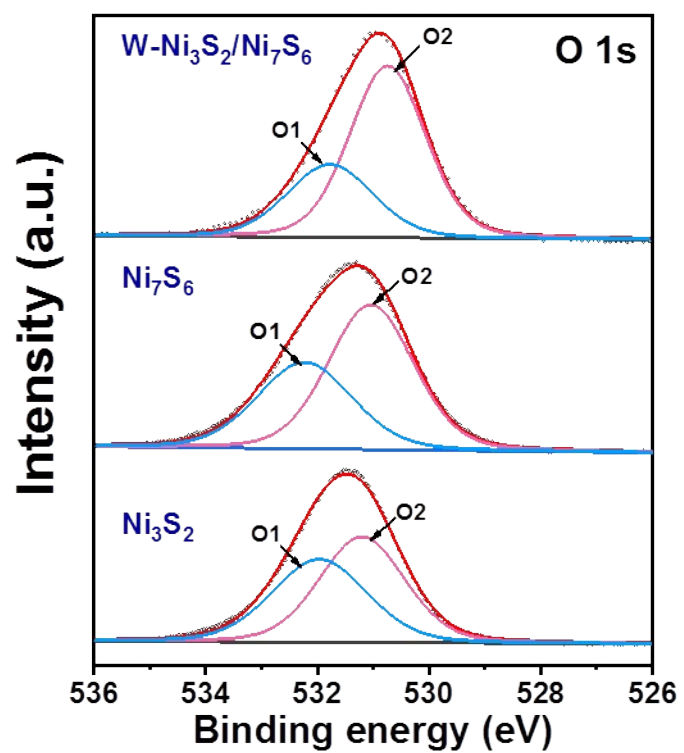

Figure S18. O 1s XPS spectra of Ni<sub>3</sub>S<sub>2</sub>, Ni<sub>7</sub>S<sub>6</sub> and W-Ni<sub>3</sub>S<sub>2</sub>/Ni<sub>7</sub>S<sub>6</sub>.

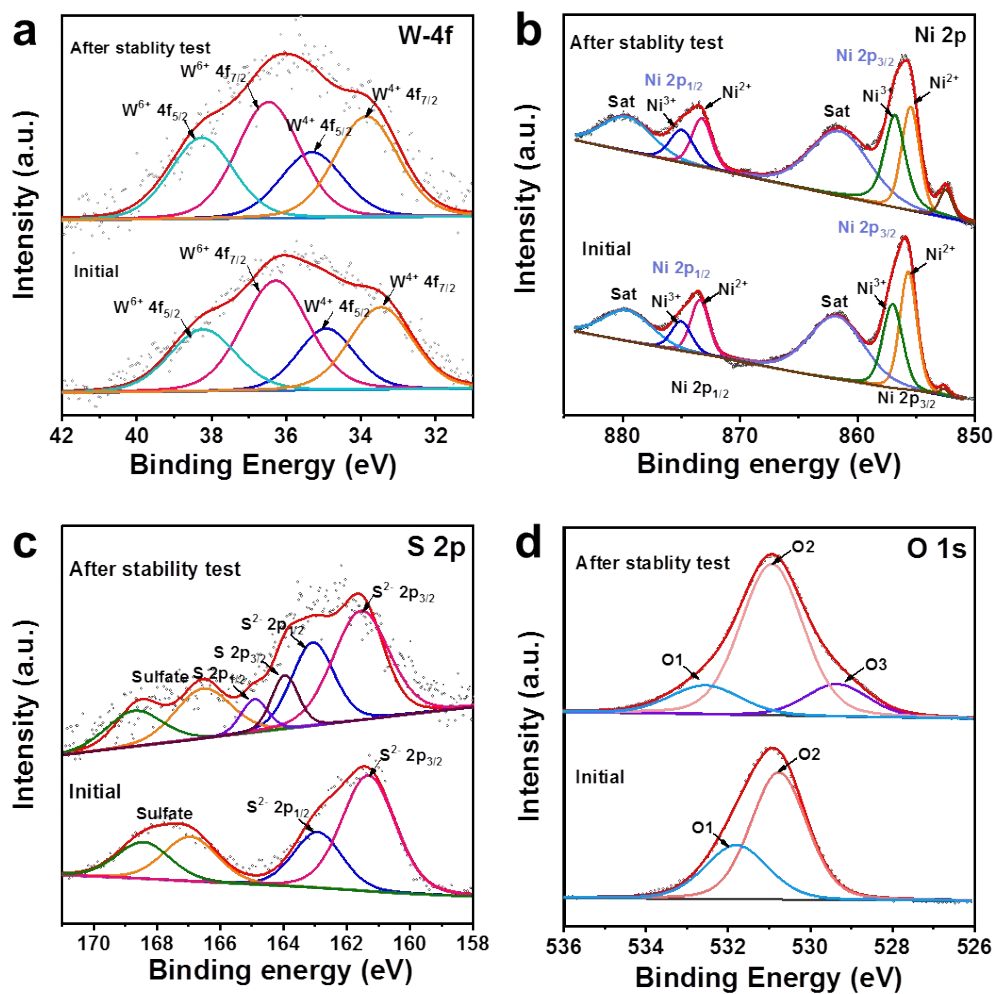

Figure S19. a) W 4f XPS spectra, b) Ni 2p XPS spectra, c) S 2p XPS spectra, d) O 1s XPS spectra of W-Ni<sub>3</sub>S<sub>2</sub>/Ni<sub>7</sub>S<sub>6</sub> before and after stability test in 1.0 M KOH.

- [1] Z. Xue, Y. Li, Y. Zhang, W. Geng, B. Jia, J. Tang, S. Bao, H. Wang, Y. Fan, Z. Wei, Z. Zhang, Z. Ke, G. Li, C. Su, *Advanced Energy Materials*. **2018**, 8, 1801564.
- [2] G. Ren, Q. Hao, J. Mao, L. Liang, H. Liu, C. Liu, J. Zhang, *Nanoscale*. **2018**, 10, 17347.
- [3] B. Fei, Z. Chen, J. Liu, H. Xu, X. Yan, H. Qing, M. Chen, R. Wu, *Advanced Energy Materials*. **2020**, 10, 2001963.
- [4] Y. Yang, H. Yao, Z. Yu, S. M. Islam, H. He, M. Yuan, Y. Yue, K. Xu, W. Hao, G. Sun, H. Li, S. Ma, P. Zapol, M. G. Kanatzidis, *Journal of the American Chemical Society*. **2019**, 141, 10417.
- [5] X. Luo, P. Ji, P. Wang, R. Cheng, D. Chen, C. Lin, J. Zhang, J. He, Z. Shi, N. Li, S. Xiao, S. Mu, *Advanced Energy Materials*. **2020**, 10, 1903891.
- [6] C. Hu, L. Zhang, Z. Zhao, A. Li, X. Chang, J. Gong, *Advanced Materials*. **2018**, 30, 1705538.
- [7] J. Dong, F. Zhang, Y. Yang, Y. Zhang, H. He, X. Huang, X. Fan, X. Zhang, *Applied Catalysis B: Environmental*. **2019**, 243, 693.
- [8] P. Hua, Z. Jia, H. Che, W. Zhou, N. Liu, F. Li, J. Wang, *Journal of Power Sources*. **2019**, 416, 95.
- [9] K. Feng, D. Zhang, F. Liu, H. Li, J. Xu, Y. Xia, Y. Li, H. Lin, S. Wang, M. Shao, Z. Kang, J. Zhong, *Advanced Energy Materials*. **2020**, 10, 2000184.
- [10] Z. Wang, Z. Lin, J. Deng, S. Shen, F. Meng, J. Zhang, Q. Zhang, W. Zhong, L. Gu, *Advanced Energy Materials*. **2021**, 11, 2003023.
- [11] X. Du, P. Che, Y. Wang, C. Yuan, X. Zhang, *International Journal of Hydrogen Energy*. **2019**, 44, 22955.
- [12] B. Ma, X. Guo, X. Zhang, Y. Chen, X. Fan, Y. Li, F. Zhang, G. Zhang, W. Peng, *Energy Technology*. **2019**, 7, 1900063.
- [13] Y. Zhou, S. Xi, X. Yang, H. Wu, *Journal of Solid State Chemistry*. **2019**, 270, 398.
- [14] R. Zhang, L. Cheng, Z. Wang, F. Kong, Y. Tsegazab, W. Lv, W. Wang, *Applied Surface Science*. **2020**, 526, 146753.
- [15] J. Li, P. Xu, R. Zhou, R. Li, L. Qiu, S. P. Jiang, D. Yuan, *Electrochimica Acta*. **2019**, 299, 152.
- [16] J. Lin, H. Wang, X. Zheng, Y. Du, C. Zhao, J. Qi, J. Cao, W. Fei, J. Feng, *Journal of Power Sources*. **2018**, 401, 329.
- [17] X. Zang, J. Teng, X. Zhang, J. Guo, *Materials Letters*. **2021**, 287, 129290.
- [18] Y. Liu, Y. Bai, W. Yang, J. Ma, K. Sun, *Electrochimica Acta*. **2021**, 367, 137534.
- [19] K. Xiao, J. Wei, W. Han, Z. Li, *Journal of Power Sources*. **2021**, 487, 229408.
- [20] Z. Zang, X. Wang, X. Li, Q. Zhao, L. Li, X. Yang, X. Yu, X. Zhang, Z. Lu, *ACS Appl Mater Interfaces*. **2021**, 13, 9865.
- [21] J. Duan, Z. Han, R. Zhang, J. Feng, L. Zhang, Q. Zhang, A. Wang, *J Colloid Interface Sci*. **2021**, 588, 248.
- [22] B. Yuan, C. Li, L. Guan, K. Li, Y. Lin, *Journal of Power Sources*. **2020**, 451, 2003023.
- [23] Q. Wu, Q. Gao, L. Sun, H. Guo, X. Tai, D. Li, L. Liu, C. Ling, X. Sun, *Chinese Journal of Catalysis*. **2021**, 42, 482.
- [24] L. Peng, J. Shen, X. Zheng, R. Xiang, M. Deng, Z. Mao, Z. Feng, L. Zhang, L. Li, Z. Wei, *Journal of Catalysis*. **2019**, 369, 345.
- [25] J. Wang, H. C. Zeng, *ACS Applied Materials & Interfaces*. **2019**, 11, 23180.
- [26] Q. Qin, L. Chen, T. Wei, X. Liu, *Small*. **2019**, 15, 1803639.
- [27] J. Li, X. Xu, B. Zhang, W. Hou, S. Lv, Y. Shi, *Applied Surface Science*. **2020**, 526, 146718.
- [28] H. Qian, B. Wu, Z. Nie, T. Liu, P. Liu, H. He, J. Wu, Z. Chen, S. Chen, *Chemical Engineering Journal*. **2020**, 420, 127646.

- [29] S. Liang, M. Jing, E. Pervaiz, H. Guo, T. Thomas, W. Song, J. Xu, A. Saad, J. Wang, H. Shen, J. Liu, M. Yang, *ACS Applied Materials & Interfaces*. **2020**, 12, 41464.
- [30] X. Zhong, J. Tang, J. Wang, M. Shao, J. Chai, S. Wang, M. Yang, Y. Yang, N. Wang, S. Wang, B. Xu, H. Pan, *Electrochimica Acta*. **2018**, 269, 55.
- [31] Y. Lin, G. Chen, H. Wan, F. Chen, X. Liu, R. Ma, *Small*. **2019**, 15, 1900348.
- [32] X. Wu, T. Zhang, J. Wei, P. Feng, X. Yan, Y. Tang, *Nano Research*. **2020**, 13, 2130.
- [33] F. Wu, X. Guo, Q. Wang, S. Lu, J. Wang, Y. Hu, G. Hao, Q. Li, M.-Q. Yang, W. Jiang, *Journal of Materials Chemistry A*. **2020**, 8, 14574.
- [34] H. Lee, X. Wu, Q. Ye, X. Wu, X. Wang, Y. Zhao, L. Sun, *Chemical Communications*. **2019**, 55, 1564.
- [35] Y. Zhu, H. Yang, K. Lan, K. Iqbal, Y. Liu, P. Ma, Z. Zhao, S. Luo, Y. Luo, J. Ma, *Nanoscale*. **2019**, 11, 2355.
- [36] H. Zhang, H. Jiang, Y. Hu, Y. Li, Q. Xu, S. Petr, C. Li, *Journal of Materials Chemistry A*. **2019**, 7, 7548.
- [37] C. Zhan, Z. Liu, Y. Zhou, M. Guo, X. Zhang, J. Tu, L. Ding, Y. Cao, *Nanoscale*. **2019**, 11, 3378.
- [38] Q. Li, D. Wang, C. Han, X. Ma, Q. Lu, Z. Xing, X. Yang, *Journal of Materials Chemistry A*. **2018**, 6, 8233.
